# Supplementary material for: Consuming alternative prey does not influence the DNA detectability half-life of pest prey in spider gut contents
Source: PeerJ. 2019 Oct 22;7:e7680. doi: 10.7717/peerj.7680 (PMC6814063; doi:10.7717/peerj.7680)
Supplement: Supplemental Information 1 [file peerj-07-7680-s001.xlsx]

## Sheet: Data
			PCR 268F - 483R
No. of DNA sample	day	Treatment	trial	amplikon
TA1	1	L	1	1
TA2	1	L	1	1
TA3	1	L	1	1
TA4	1	LD	1	1
TA5	1	LD	1	1
TA6	1	LD	1	1
TB1	3	LD	1	1
TB2	3	LD	1	0
TB3	3	LD	1	0
TB4	3	LD	1	1
TB5	3	LD	1	0
TB6	3	LD	1	1
TB7	3	LD	1	0
TB8	3	LD	1	1
TB9	3	LD	1	1
TB10	3	LD	1	0
TC1	3	L	1	1
TC2	3	L	1	1
TC3	3	L	1	1
TC4	3	L	1	1
TC5	3	L	1	1
TC6	3	L	1	0
TC7	3	L	1	1
TC8	3	L	1	0
TC9	3	L	1	1
TC10	3	L	1	1
TD1	5	LD	1	0
TD2	5	LD	1	0
TD3	5	LD	1	0
TD4	5	LD	1	0
TD5	5	LD	1	1
TD6	5	LD	1	0
TD7	5	LD	1	1
TD8	5	LD	1	1
TD9	5	LD	1	1
TD10	5	LD	1	1
TE1	5	L	1	1
TE2	5	L	1	1
TE3	5	L	1	0
TE4	5	L	1	1
TE5	5	L	1	1
TE6	5	L	1	1
TE7	5	L	1	1
TE8	5	L	1	1
TE9	5	L	1	1
TE10	5	L	1	1
TF1	7	LD	1	0
TF2	7	LD	1	0
TF3	7	LD	1	0
TF4	7	LD	1	0
TF5	7	LD	1	1
TF6	7	LD	1	1
TF7	7	LD	1	0
TF8	7	LD	1	0
TF9	7	LD	1	0
TF10	7	LD	1	1
TG1	7	L	1	0
TG2	7	L	1	0
TG3	7	L	1	1
TG4	7	L	1	0
TG5	7	L	1	0
TG6	7	L	1	0
TG7	7	L	1	0
TG8	7	L	1	0
TG9	7	L	1	0
TG10	7	L	1	0
TH1	9	LD	1	1
TH2	9	LD	1	0
TH3	9	LD	1	0
TH4	9	LD	1	1
TH5	9	LD	1	0
TH6	9	LD	1	0
TH7	9	LD	1	0
TH8	9	LD	1	1
TH9	9	LD	1	0
TH10	9	LD	1	0
TI1	9	L	1	1
TI2	9	L	1	1
TI3	9	L	1	1
TI4	9	L	1	0
TI5	9	L	1	0
TI6	9	L	1	0
TI7	9	L	1	0
TI8	9	L	1	0
TI9	9	L	1	0
TI10	9	L	1	0
2TA1	1	LD	2	1
2TA2	1	LD	2	1
2TA3	1	LD	2	1
2TA4	1	LD	2	1
2TA5	1	LD	2	1
2TA6	1	L	2	1
2TA7	1	L	2	1
2TA8	1	L	2	1
2TA9	1	L	2	1
2TA10	1	L	2	1
2TB1	3	LD	2	0
2TB2	3	LD	2	0
2TB3	3	LD	2	0
2TB4	3	LD	2	1
2TB5	3	LD	2	1
2TB6	3	LD	2	1
2TB7	3	LD	2	1
2TB8	3	LD	2	0
2TB9	3	LD	2	1
2TB10	3	LD	2	1
2TC1	3	L	2	0
2TC2	3	L	2	1
2TC3	3	L	2	1
2TC4	3	L	2	1
2TC5	3	L	2	1
2TC6	3	L	2	1
2TC7	3	L	2	0
2TC8	3	L	2	0
2TC9	3	L	2	0
2TC10	3	L	2	0
2TD1	5	LD	2	0
2TD2	5	LD	2	0
2TD3	5	LD	2	0
2TD4	5	LD	2	0
2TD5	5	LD	2	1
2TD6	5	LD	2	1
2TD7	5	LD	2	0
2TD8	5	LD	2	1
2TD9	5	LD	2	0
2TD10	5	LD	2	1
2TE1	5	L	2	0
2TE2	5	L	2	1
2TE3	5	L	2	1
2TE4	5	L	2	1
2TE5	5	L	2	1
2TE6	5	L	2	1
2TE7	5	L	2	0
2TE8	5	L	2	1
2TE9	5	L	2	0
2TE10	5	L	2	0
2TF1	7	LD	2	1
2TF2	7	LD	2	0
2TF3	7	LD	2	0
2TF4	7	LD	2	0
2TF5	7	LD	2	1
2TF6	7	LD	2	0
2TF7	7	LD	2	1
2TF8	7	LD	2	0
2TF9	7	LD	2	0
2TF10	7	LD	2	1
2TG1	7	L	2	1
2TG2	7	L	2	1
2TG3	7	L	2	0
2TG4	7	L	2	0
2TG5	7	L	2	1
2TG6	7	L	2	0
2TG7	7	L	2	0
2TG8	7	L	2	0
2TG9	7	L	2	0
2TG10	7	L	2	1
2TH1	9	LD	2	1
2TH2	9	LD	2	1
2TH3	9	LD	2	0
2TH4	9	LD	2	0
2TH5	9	LD	2	0
2TH6	9	LD	2	0
2TH7	9	LD	2	1
2TH8	9	LD	2	1
2TH9	9	LD	2	0
2TH10	9	LD	2	0
2TI1	9	L	2	1
2TI2	9	L	2	1
2TI3	9	L	2	0
2TI4	9	L	2	0
2TI5	9	L	2	0
2TI6	9	L	2	0
2TI7	9	L	2	1
2TI8	9	L	2	1
2TI9	9	L	2	1
2TI10	9	L	2	0
3TJ1	14	LD	3	0
3TJ2	14	LD	3	0
3TJ3	14	LD	3	0
3TJ4	14	LD	3	1
3TJ5	14	LD	3	0
3TJ6	14	LD	3	0
3TJ7	14	LD	3	0
3TJ8	14	LD	3	0
3TJ9	14	LD	3	0
3TJ10	14	LD	3	0
3TJ11	14	LD	3	0
3TJ12	14	LD	3	1
3TJ13	14	LD	3	0
3TJ14	14	LD	3	1
3TJ15	14	LD	3	0
3TJ16	14	LD	3	0
3TJ17	14	LD	3	0
3TJ18	14	LD	3	0
3TJ19	14	LD	3	0
3TJ20	14	LD	3	0
3TK1	14	L	3	0
3TK2	14	L	3	0
3TK3	14	L	3	0
3TK4	14	L	3	1
3TK5	14	L	3	0
3TK6	14	L	3	0
3TK7	14	L	3	0
3TK8	14	L	3	0
3TK9	14	L	3	0
3TK10	14	L	3	0
3TK11	14	L	3	0
3TK12	14	L	3	0
3TK13	14	L	3	0
3TK14	14	L	3	1
3TK15	14	L	3	0
3TK16	14	L	3	0
3TK17	14	L	3	0
3TK18	14	L	3	1
3TK19	14	L	3	0
